# Supplementary material
Source: MDPI journal article supplement (https://www.mdpi.com/1424-2818/14/11/957)
Supplement: s1 [file diversity-1981904-supplementary.xlsx]

## Sheet: raw
Table S1: Studies in Europe investigating the presence of Haemoproteus parasites DNA in wild Cu-licoides biting midges used in the interaction network analysis
lineage	biting midge species	country	investigated	positive	study	observations
BLUTI09	C. circumscriptus	Spain	97	2	Ferraguti, M. (2013) 10.1186/1756-3305-6-208
CCF4	C. segnis	Czech Republic	9	2	Synek, P. (2013)10.1007/s00436-012-3204-3	pools (8-55 insects), mixed infections were detected in three pools
CCF5	C. segnis	Lithuania	24	2	Žiegytė, R. (2022) 10.3390/microorganisms10050898
CIRCUM01	C. circumscriptus	Spain	97	1	Ferraguti, M. (2013) 10.1186/1756-3305-6-208
CIRCUM02	C. circumscriptus	Spain	97	1	Ferraguti, M. (2013) 10.1186/1756-3305-6-208
CIRCUM03	C. circumscriptus	Spain	97	3	Ferraguti, M. (2013) 10.1186/1756-3305-6-208
CIRCUM05	C. circumscriptus	Spain	97	1	Ferraguti, M. (2013) 10.1186/1756-3305-6-208
COLL2	C. segnis	Lithuania	24	1	Žiegytė, R. (2021) 10.1186/s13071-020-04516-1
CUKI1	C. kibunensis	Czech Republic	31	2	Synek, P. (2013)10.1007/s00436-012-3204-3	pools (8-55 insects)
CUKI1	C. segnis	Czech Republic	9	1	Synek, P. (2013)10.1007/s00436-012-3204-3	pools (8-55 insects), mixed infections were detected in three pools
CUPAO01	C. paolae	Spain	320	1	Veiga, J. (2018) 10.1186/s13071-018-3098-8	pools (1-11 insects)
CWT4	C. segnis	Lithuania	2	1	Žiegytė, R. (2021) 10.1186/s13071-020-04516-1
GAGLA03	C. circumscriptus	Spain	97	2	Ferraguti, M. (2013) 10.1186/1756-3305-6-208
AEFUN03	C. circumscriptus	Spain	97	1	Veiga, J. (2018) 10.1186/s13071-018-3098-8	pools (1-11 insects)
HAWF1	C. festivipennis	Lithuania	58	1	Žiegytė, R. (2022) 10.3390/microorganisms10050898
HAWF1	C. obsoletus	Lithuania	50	2	Žiegytė, R. (2022) 10.3390/microorganisms10050898
HAWF1	C. punctatus	Lithuania	67	1	Bernotienė, R. (2019) 10.1186/s13071-019-3559-8
HAWF1	C. scoticus	Lithuania	63	1	Bernotienė, R. (2019) 10.1186/s13071-019-3559-8
HAWF1	C. segnis	Lithuania	24	2	Žiegytė, R. (2022) 10.3390/microorganisms10050898
CIRCUM01	C. alazanicus	Bulgaria	222	1	Bobeba, A. (2014) 10.1007/s00436-014-4140-1
CIRCUM01	C. circumscriptus	Bulgaria	195	1	Bobeba, A. (2014) 10.1007/s00436-014-4140-1
CIRCUM01	C. festivipennis	Bulgaria	276	1	Bobeba, A. (2014) 10.1007/s00436-014-4140-1
CIRCUM03	C. alazanicus	Bulgaria	222	1	Bobeba, A. (2014) 10.1007/s00436-014-4140-1
CULCIR1	C. circumscriptus	Bulgaria	72	1	Bobeva, A. (2013) 10.2478/s11686-013-0185-z
DELURB01	C. alazanicus	Bulgaria	222	1	Bobeba, A. (2014) 10.1007/s00436-014-4140-1
GAGLA03	C. circumscriptus	Spain	97	2	Veiga, J. (2018) 10.1186/s13071-018-3098-8	pools (1-11 insects)
HAWF2	C. circumscriptus	Bulgaria	72	1	Bobeva, A. (2013) 10.2478/s11686-013-0185-z
HIICT1	C. festivipennis	Lithuania	89	3	present study
HIICT1	C. kibunensis	Lithuania	114	4	present study
HIICT1	C. obsoletus	Lithuania	185	1	present study
HIICT1	C. pallidicornis	Lithuania	19	1	present study
ORORI01	C. alazanicus	Bulgaria	222	1	Bobeba, A. (2014) 10.1007/s00436-014-4140-1
ORORI02	C. alazanicus	Bulgaria	222	1	Bobeba, A. (2014) 10.1007/s00436-014-4140-1
SFC1	C. alazanicus	Bulgaria	222	1	Bobeba, A. (2014) 10.1007/s00436-014-4140-1
SFC3	C. alazanicus	Bulgaria	222	1	Bobeba, A. (2014) 10.1007/s00436-014-4140-1
SISKIN1	C. impunctatus	Lithuania	267	1	Bernotienė, R. (2016) 10.1186/s12936-016-1338-y
TUPHI01	C. alazanicus	Bulgaria	222	1	Bobeba, A. (2014) 10.1007/s00436-014-4140-1
TURDUS2	C. circumscriptus	Spain	97	1	Veiga, J. (2018) 10.1186/s13071-018-3098-8	pools (1-11 insects)
TURDUS2	C. impunctatus	Lithuania	267	1	Bernotienė, R. (2016) 10.1186/s12936-016-1338-y
TURDUS2	C. paolae	Spain	320	1	Veiga, J. (2018) 10.1186/s13071-018-3098-8	pools (1-11 insects)
TURDUS2	C. pictipennis	Bulgaria	18	3	Bobeva, A. (2013) 10.2478/s11686-013-0185-z
TURDUS2	C. pictipennis	Lithuania	5	1	Bernotienė, R. (2016) 10.1186/s12936-016-1338-y
TURDUS2	C. punctatus	Lithuania	28	1	Bernotienė, R. (2016) 10.1186/s12936-016-1338-y
WW2	C. alazanicus	Bulgaria	222	1	Bobeba, A. (2014) 10.1007/s00436-014-4140-1
LULU1	C. scoticus	Lithuania	63	1	Bernotienė, R. (2019) 10.1186/s13071-019-3559-8
CULKIB01	C. kibunensis	Lithuania	114	1	present study
CULKIB02	C. kibunensis	Lithuania	114	1	present study
CCF3	C. segnis	Lithuania	42	2	present study
PARUS1	C. pictipennis	Lithuania	37	1	Žiegytė, R. (2022) 10.3390/microorganisms10050898
PFC1	C. kibunensis	Lithuania	68	2	Bernotienė, R. (2019) 10.1186/s13071-019-3559-8
PFC1	C. punctatus	Lithuania	67	1	Bernotienė, R. (2019) 10.1186/s13071-019-3559-8
PHSIB1	C. segnis	Lithuania	42	1	present study
PHYBOR04	C. kibunensis	Lithuania	128	1	Žiegytė, R. (2022) 10.3390/microorganisms10050898
RB1	C. kibunensis	Russia	35	1	Žiegytė, R. (2021) 10.1186/s13071-020-04516-1
RB1	C. obsoletus	Lithuania	123	3	Bernotienė, R. (2019) 10.1186/s13071-019-3559-8
ROBIN1	C. festivipennis	Lithuania	20	1	Bernotienė, R. (2019) 10.1186/s13071-019-3559-8
ROBIN1	C. obsoletus	Lithuania	123	1	Bernotienė, R. (2019) 10.1186/s13071-019-3559-8
ROFI1	C. segnis	Czech Republic	9	3	Synek, P. (2013)10.1007/s00436-012-3204-3	pools (8-55 insects), mixed infections were detected in three pools
SFC4	C. obsoletus	Lithuania	123	1	Bernotienė, R. (2019) 10.1186/s13071-019-3559-8
SISKIN1	C. impunctatus	Lithuania	20	1	Žiegytė, R. (2021) 10.1186/s13071-020-04516-1
SISKIN1	C. kibunensis	Lithuania	11	1	Žiegytė, R. (2021) 10.1186/s13071-020-04516-1
SISKIN1	C. kibunensis	Lithuania	68	1	Bernotienė, R. (2019) 10.1186/s13071-019-3559-8
SISKIN1	C. obsoletus	Lithuania	123	1	Bernotienė, R. (2019) 10.1186/s13071-019-3559-8
SISKIN1	C. scoticus	Lithuania	63	2	Bernotienė, R. (2019) 10.1186/s13071-019-3559-8
SISKIN1	C. segnis	Lithuania	24	1	Žiegytė, R. (2021) 10.1186/s13071-020-04516-1
SISKIN1	C. segnis	Russia	26	1	Žiegytė, R. (2021) 10.1186/s13071-020-04516-1
SYAT01	C. pictipennis	Lithuania	28	1	Bernotienė, R. (2019) 10.1186/s13071-019-3559-8
SYAT01	C. segnis	Lithuania	24	1	Žiegytė, R. (2021) 10.1186/s13071-020-04516-1
SYAT02	C. festivipennis	Lithuania	58	1	Žiegytė, R. (2022) 10.3390/microorganisms10050898
SYAT02	C. pictipennis	Lithuania	37	3	Žiegytė, R. (2022) 10.3390/microorganisms10050898
TUCHR01	C. kibunensis	Lithuania	114	1	present study
TUPHI01	C. kibunensis	Lithuania	114	4	present study
TUPHI01	C. kibunensis	Lithuania	11	1	Žiegytė, R. (2021) 10.1186/s13071-020-04516-1
TUPHI01	C. kibunensis	Czech Republic	31	11	Synek, P. (2013)10.1007/s00436-012-3204-3	pools (8-55 insects)
TUPHI01	C. obsoletus	Lithuania	50	1	Žiegytė, R. (2022) 10.3390/microorganisms10050898
TUPHI01	C. pictipennis	Lithuania	2	1	present study
TUPHI01	C. pictipennis	Russia	70	5	Žiegytė, R. (2021) 10.1186/s13071-020-04516-1
TUPHI01	C. pictipennis	Lithuania	28	1	Bernotienė, R. (2019) 10.1186/s13071-019-3559-8
TUPHI01	C. pictipennis	Lithuania	37	3	Žiegytė, R. (2022) 10.3390/microorganisms10050898
TUPHI01	C. segnis	Lithuania	42	4	present study
TUPHI01	C. segnis	Czech Republic	9	5	Synek, P. (2013)10.1007/s00436-012-3204-3	pools (8-55 insects), mixed infections were detected in three pools
TUPHI01	C. segnis	Lithuania	24	1	Žiegytė, R. (2022) 10.3390/microorganisms10050898
TURDUS2	C. festivipennis	Czech Republic	8	1	Synek, P. (2013)10.1007/s00436-012-3204-3	pools (8-55 insects)
TURDUS2	C. kibunensis	Lithuania	114	6	present study
TURDUS2	C. kibunensis	Lithuania	11	3	Žiegytė, R. (2021) 10.1186/s13071-020-04516-1
TURDUS2	C. kibunensis	Czech Republic	31	3	Synek, P. (2013)10.1007/s00436-012-3204-3	pools (8-55 insects)
TURDUS2	C. kibunensis	Lithuania	68	2	Bernotienė, R. (2019) 10.1186/s13071-019-3559-8
TURDUS2	C. obsoletus	Lithuania	123	2	Bernotienė, R. (2019) 10.1186/s13071-019-3559-8
TURDUS2	C. punctatus	Russia	1	1	Žiegytė, R. (2021) 10.1186/s13071-020-04516-1
TURDUS2	C. punctatus	Lithuania	67	1	Bernotienė, R. (2019) 10.1186/s13071-019-3559-8
TURDUS2	C. scoticus	Lithuania	63	3	Bernotienė, R. (2019) 10.1186/s13071-019-3559-8
TURDUS2	C. segnis	Lithuania	42	2	present study
TURDUS2	C. segnis	Russia	26	1	Žiegytė, R. (2021) 10.1186/s13071-020-04516-1
TUMER11	C. segnis	Lithuania	24	1	Žiegytė, R. (2021) 10.1186/s13071-020-04516-1
WW1	C. kibunensis	Lithuania	128	7	Žiegytė, R. (2022) 10.3390/microorganisms10050898
WW1	C. pallidicornis	Lithuania	9	1	Žiegytė, R. (2022) 10.3390/microorganisms10050898
WW2	C. kibunensis	Lithuania	128	2	Žiegytė, R. (2022) 10.3390/microorganisms10050898
WW2	C. obsoletus	Lithuania	185	1	present study
WW2	C. punctatus	Lithuania	67	1	Bernotienė, R. (2019) 10.1186/s13071-019-3559-8
